# Supplementary material
Source: PubMed Central journal article supplement (PMC5683102)
Supplement: NIHMS905340-supplement-1.pdf [file NIHMS905340-supplement-1.pdf]

1 **Supplemental Figure 1.**

2 **A.**

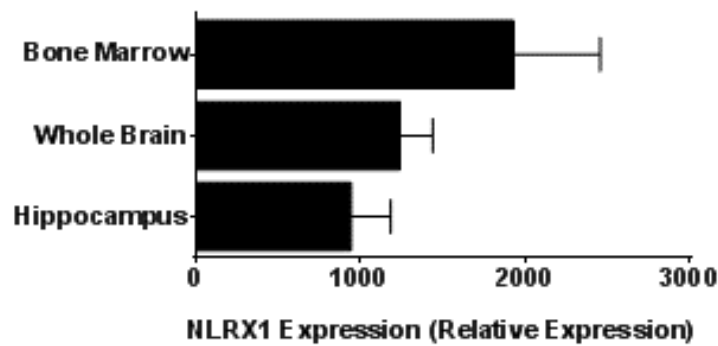

8 **B.**

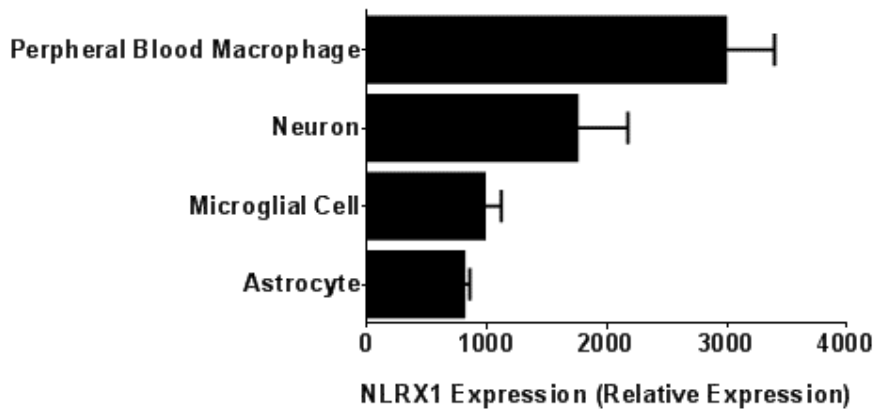

14

15

16 **Supplemental Figure 1. *NLRX1* is highly expressed in the brain and cells relevant to injury.**

17 Expression of human *NLRX1* was evaluated in the brain and select cell types using a publicly  
18 accessible microarray metadata analysis search engine (Nextbio:  
19 <http://www.nextbio.com/b/search/ba.nb>. Accessed 2015 Dec. 10). Expression was compared  
20 with bone marrow and macrophages, which highly express *NLRX1*.

21

22

23

24 **Supplemental Figure 2.**

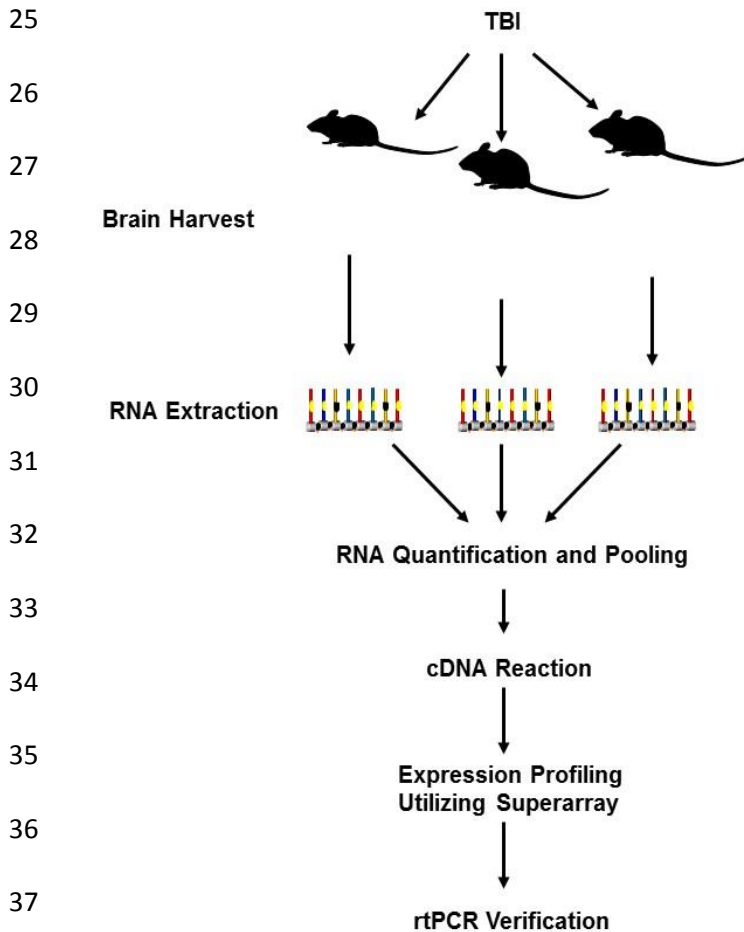

39 **Supplemental Figure 2. Schematic Illustrating the Experimental Design for Expression**

40 **Profiling. A.** Multiple mice from each genotype and condition were subjected to either TBI or

41 sham. Brains were harvested 3 days following the initial injury. The total brain RNA from each

42 brain hemisphere (TBI or contralateral) was quantified for each mouse and pooled in equal

43 amounts in separate reactions for each genotype. The pooled RNA was converted into cDNA and

44 expression profiling was conducted using a panel of Superarrays (Qiagen). Expression data was

45 verified by evaluation of gene expression changes of a subset of individual genes using rtPCR

46 from both pooled and un-pooled samples.

47 **Supplemental Figure 3.**

|    | Fold Change   | Fold Change | Gene Name | Fold Change | Gene Name | Fold Change | Gene Name |
|----|---------------|-------------|-----------|-------------|-----------|-------------|-----------|
| 48 | 8.00 - 8.99   | 8.48        | Card10    | 2.00        | Tnfrsf1a  | -2.02       | Slc20a1   |
| 49 | 7.00 - 7.99   | 8.05        | Relb      | 1.99        | Crebbp    | -4.10       | Tnf       |
| 50 | 6.00 - 6.99   | 7.97        | Il10      | 1.99        | Ripk1     | -8.61       | Ccl2      |
| 51 | 5.00 - 5.99   | 4.75        | Fasl      | 1.99        | Eif2ak2   |             |           |
| 52 | 4.00 - 4.99   | 4.12        | Atf1      | 1.99        | Nfkb1     |             |           |
| 53 | 3.00 - 3.99   | 4.11        | Agt       | 1.99        | Egr1      |             |           |
| 54 | 2.00 - 2.99   | 4.10        | F2r       | 1.98        | Cflar     |             |           |
| 55 | -1.99 - 1.99  | 4.10        | Il1a      | 1.98        | Ripk2     |             |           |
| 56 | -2.00 - -2.99 | 4.09        | Irak1     | 1.97        | Raf1      |             |           |
| 57 | -3.00 - -3.99 | 4.08        | Bcl3      | 1.92        | Card11    |             |           |
| 58 | -4.00 - -4.99 | 4.08        | Tnfaip3   | 1.91        | Csf1      |             |           |
| 59 | -5.00 - -5.99 | 4.08        | Fadd      | 1.79        | Csf3      |             |           |
| 60 | -6.00 - -6.99 | 4.06        | Il1r1     | 1.11        | Csf2      |             |           |
| 61 | -7.00 - -7.99 | 4.05        | Tlr1      | 1.03        | Lta       |             |           |
| 62 | -8.00 - -8.99 | 4.04        | Cd27      | 1.02        | Hmox1     |             |           |
| 63 |               | 4.02        | Nfkbia    | 1.01        | Tlr4      |             |           |
| 64 |               | 4.01        | Nod1      | 1.01        | Ikbke     |             |           |
| 65 |               | 3.98        | Rela      | 1.01        | Icam1     |             |           |
| 66 |               | 3.94        | Myd88     | 1.01        | Traf5     |             |           |
| 67 |               | 3.93        | Fos       | 1.01        | Zap70     |             |           |
| 68 |               | 2.05        | Egfr      | 1.01        | Tlr9      |             |           |
| 69 |               | 2.04        | Stat1     | 1.01        | Ifng      |             |           |
| 70 |               | 2.04        | Tnfsf14   | 1.01        | Smad3     |             |           |
| 71 |               | 2.03        | Birc3     | 1.00        | Casp1     |             |           |
| 72 |               | 2.03        | Nfkb2     | -1.00       | Tlr3      |             |           |
| 73 |               | 2.02        | Elk1      | -1.00       | Tollip    |             |           |
| 74 |               | 2.02        | Bcl10     | -1.00       | Traf3     |             |           |
| 75 |               | 2.02        | Ikbkg     | -1.01       | Tnfrsf1b  |             |           |
| 76 |               | 2.02        | Tlr6      | -1.01       | Tnfsf10   |             |           |
| 77 |               | 2.02        | Cd40      | -1.01       | Mapk3     |             |           |
|    |               | 2.02        | Ikbkb     | -1.02       | Ccl5      |             |           |
|    |               | 2.02        | Map3k1    | -1.02       | Bcl2a1a   |             |           |
|    |               | 2.02        | Tnfrsf10b | -1.04       | Atf2      |             |           |
|    |               | 2.02        | Traf2     | -1.99       | Il1b      |             |           |
|    |               | 2.02        | Akt1      |             |           |             |           |
|    |               | 2.02        | Chuk      |             |           |             |           |
|    |               | 2.01        | Irf1      |             |           |             |           |
|    |               | 2.01        | Ltbr      |             |           |             |           |
|    |               | 2.01        | Casp8     |             |           |             |           |
|    |               | 2.01        | Tlr2      |             |           |             |           |
|    |               | 2.01        | Jun       |             |           |             |           |
|    |               | 2.01        | Bcl2l1    |             |           |             |           |
|    |               | 2.01        | Rel       |             |           |             |           |
|    |               | 2.01        | Irak2     |             |           |             |           |
|    |               | 2.01        | Tbk1      |             |           |             |           |
|    |               | 2.00        | Tradd     |             |           |             |           |
|    |               | 2.00        | Traf6     |             |           |             |           |

71 **Supplemental Figure 3. Genes associated with NF- $\kappa$ B signaling are significantly up-**  
 72 **regulated in *Nlr1*<sup>-/-</sup> mice following TBI.** Gene transcription was profiled from RNA collected  
 73 from wild type and *Nlr1*<sup>-/-</sup> brains 3 days following injury. Data reflects the fold change in  
 74 expression for genes associated with NF- $\kappa$ B signaling that were identified as being significantly  
 75 up- or down-regulated in the brain of *Nlr1*<sup>-/-</sup> mice compared to the wild type animals. Greater  
 76 than a 2-fold change in gene expression is considered significant. Three randomly selected brains  
 77 from each genotype and treatment group were selected and pooled for profiling studies.

78 **Supplemental Figure 4.**

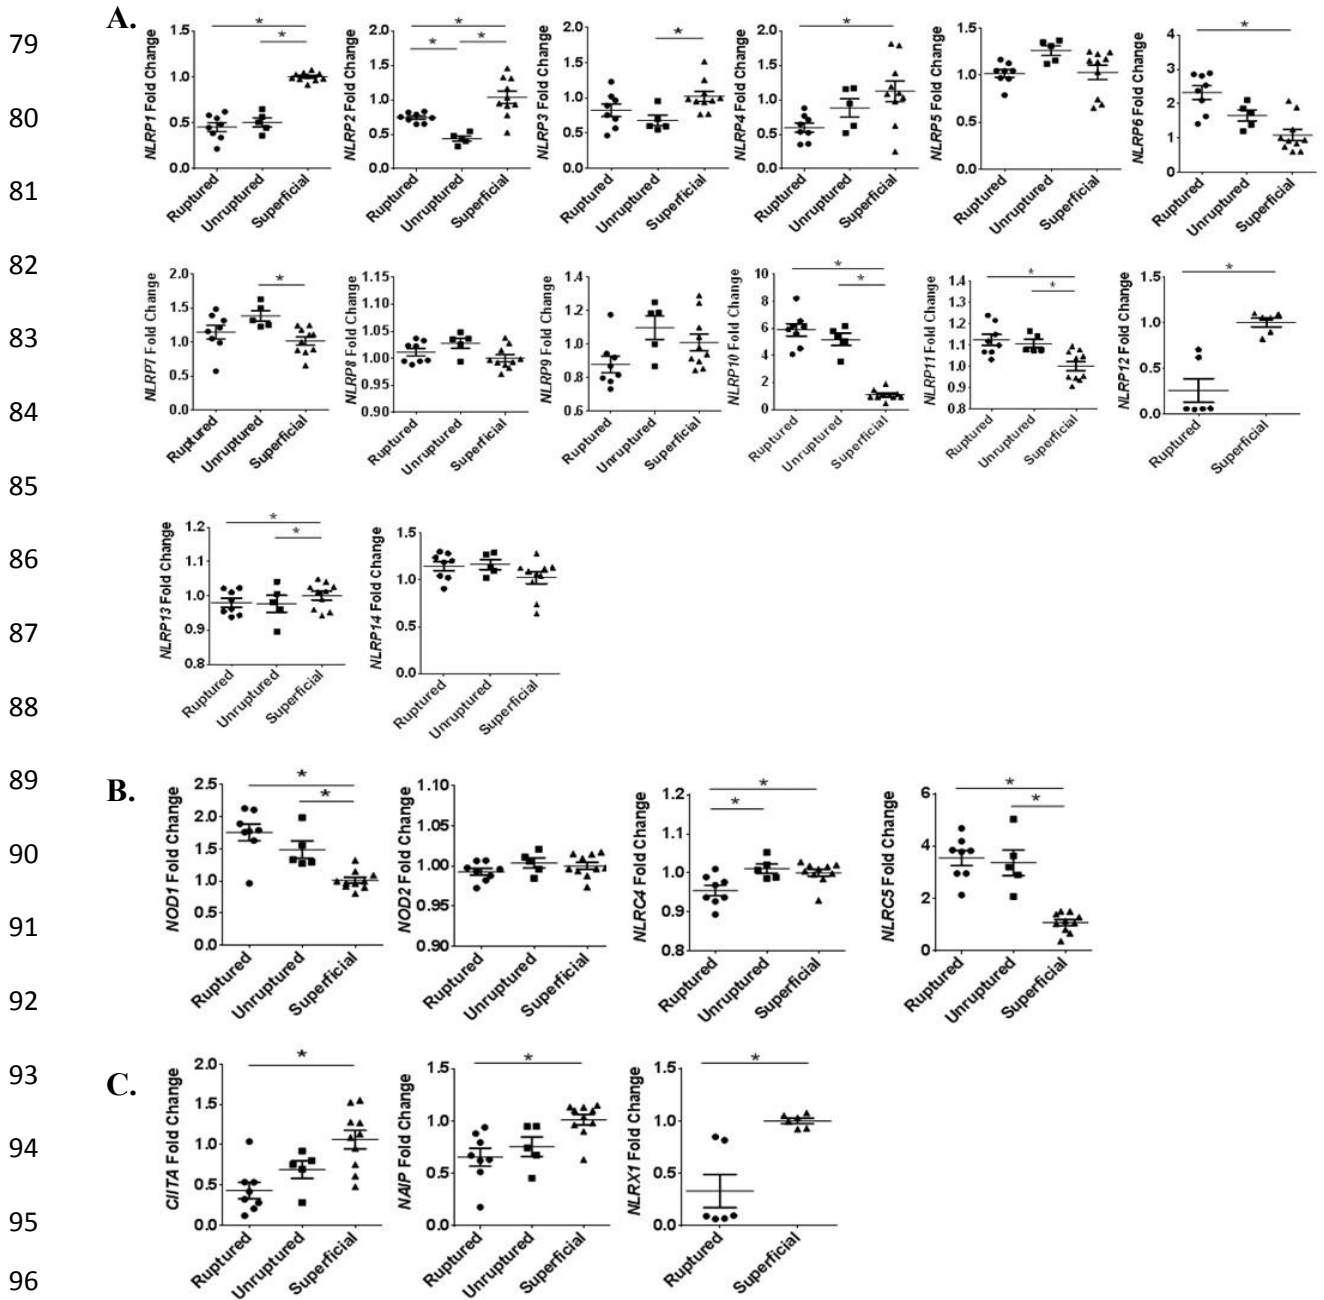

97 **Supplemental Figure 4. NLR expression following non-traumatic brain injury in human**  
 98 **subjects. A-C)** The fold change in gene expression was determined for the 22 human NLR family  
 99 members using a retrospective analysis of gene expression metadata from studies evaluating either  
 100 ruptured, unruptured, or superficial intracranial aneurysms in human subjects (GSE26969;  
 101 GSE54083). (n=5-10 specimens/group; \*p<0.05).
